# Supplementary material
Source: PubMed Central journal article supplement (PMC3859194)
Supplement: NIHMS529175-supplement-Supp_Figure_S1-S8___Table_S1-S2.pdf [file NIHMS529175-supplement-Supp_Figure_S1-S8___Table_S1-S2.pdf]

## Supplementary Figure S1

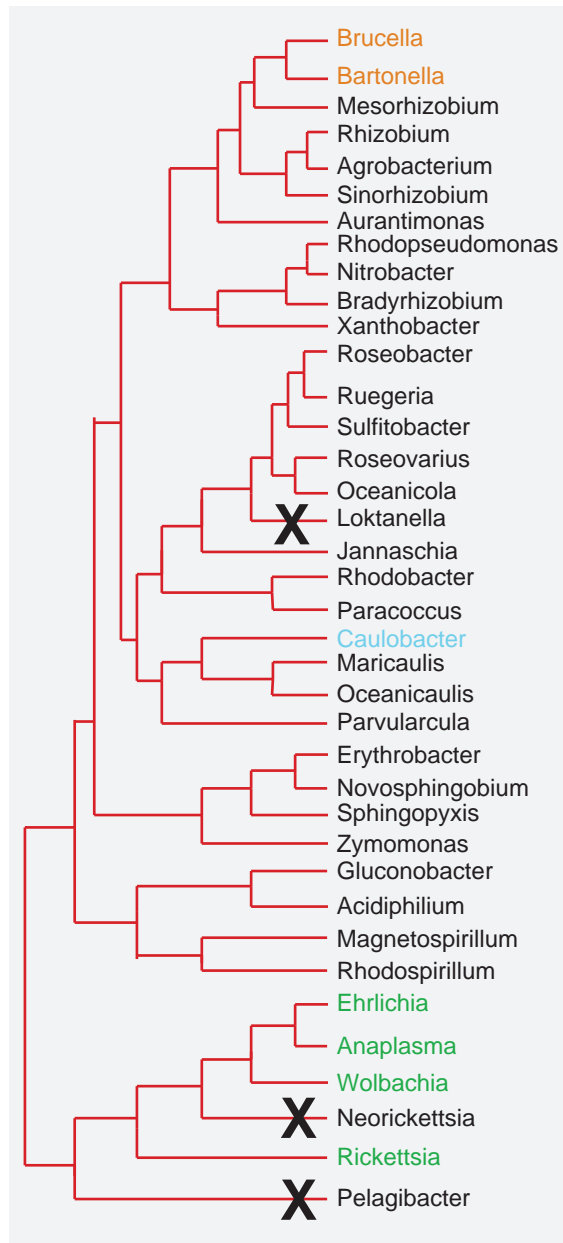

Conservation of the PopZ coding sequence through *Alphaproteobacterial* lineages. The diagram depicts a species tree of the *Alphaproteobacteria*, taken from the construction by Williams et al. (2007), and based on Bayesian analysis of consensus alignments for 104 protein families. The branches end at the level of Genus. PopZ homologs were identified in all branches of the tree with the exception of *Loktanella*, *Neorickettsia*, and *Pelagibacter* (gene loss is indicated by an X). Genera discussed in detail in Supplementary Figure 2 are highlighted in color.

Williams, K.P., Sobral, B.W., Dickerman, A.W. (2007) A robust species tree for the alphaproteobacteria. *J Bacteriol* **189**: 4578–4586

# Supplementary Figure S2

## Region #1

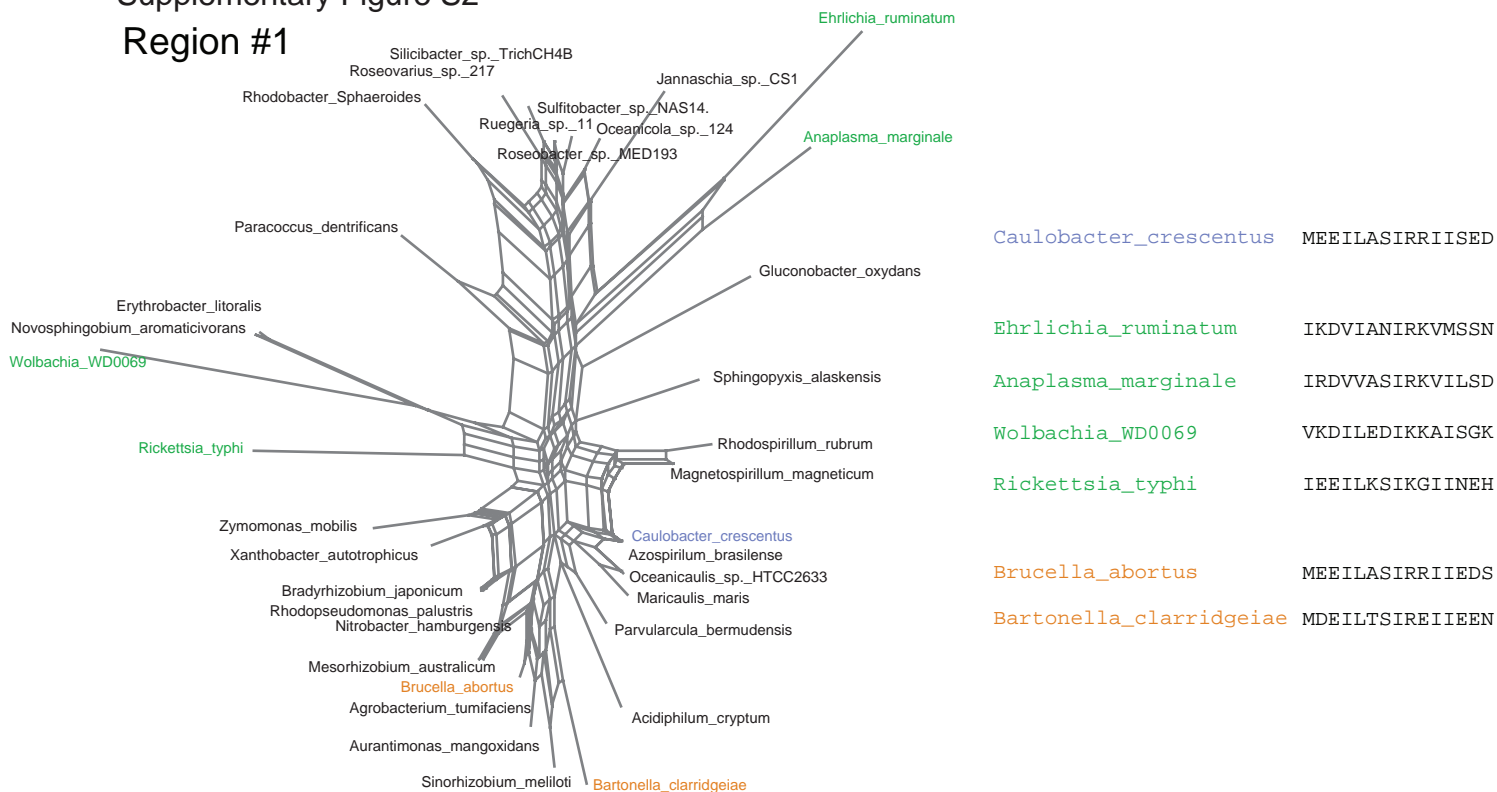

## Region #3

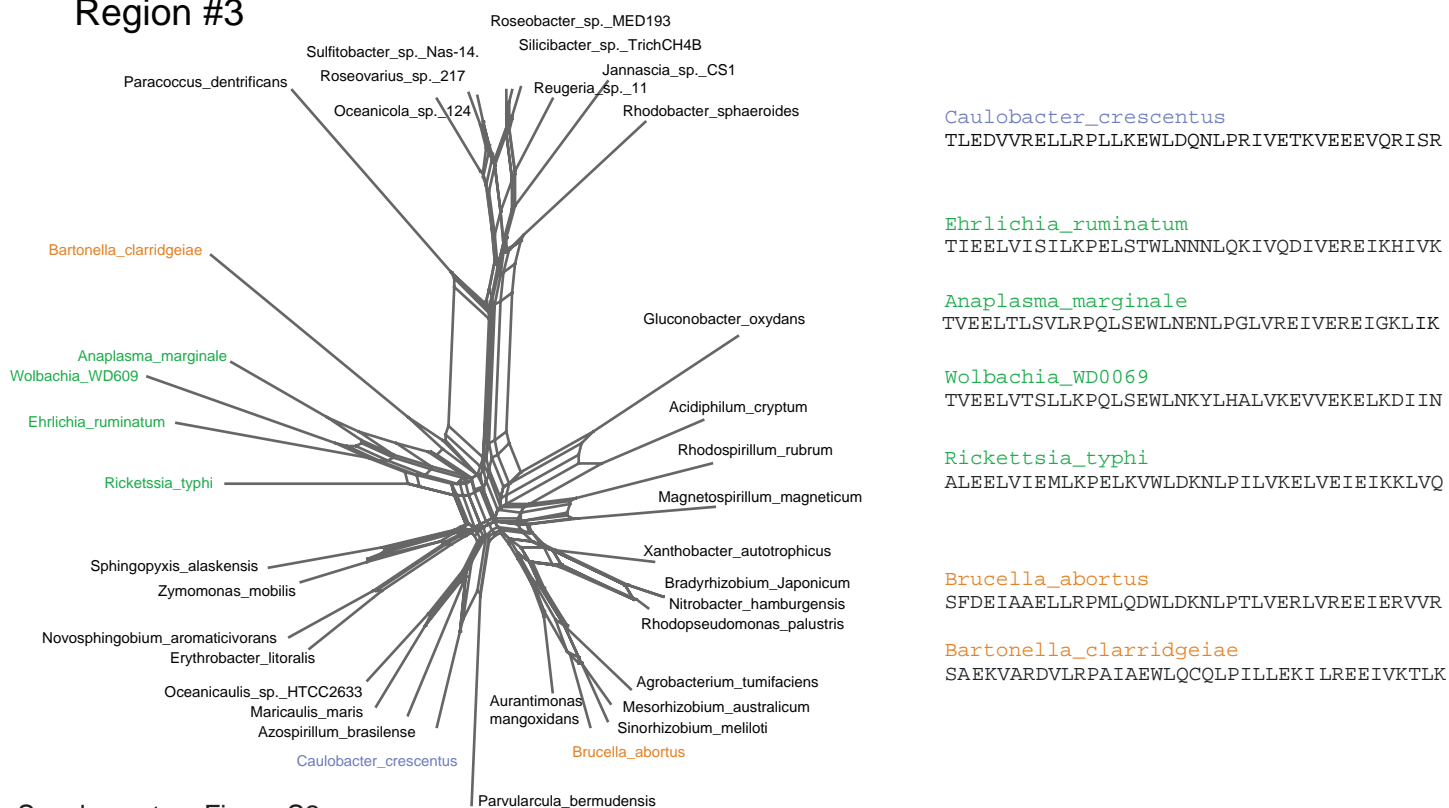

### Supplementary Figure S2:

Phylogenetic tree diagrams for conserved regions in PopZ. The Splitstree4 software package (Huson and Bryant, 2006) was used to create unrooted networks that show the divergence of PopZ coding sequences across alphaproteobacterial phyla. The most conserved sequence regions within R1 (top panel) and R3 (bottom panel) were taken from one representative of each genus (Supplementary Figure 1) and used to make two separate trees. Members of the Rickettsiales order (highlighted in green) have divergent R1 sequences but similar R3 sequences. Conversely, two members of the Rhizobiales order, Bartonella and Brucella (highlighted in orange) have similar R1 sequences but divergent R3 sequences. The relevant amino acid sequences for these species (and also Caloubacter crescentus) are shown on the right side of the tree diagram. These different patterns of phylogenetic conservation indicate that a significant fraction of the residues in R1 and R3 are not necessarily co-conserved, and that these regions of PopZ are evolving under different processes that do not generate identical tree signals.

### Supplementary Figure S3

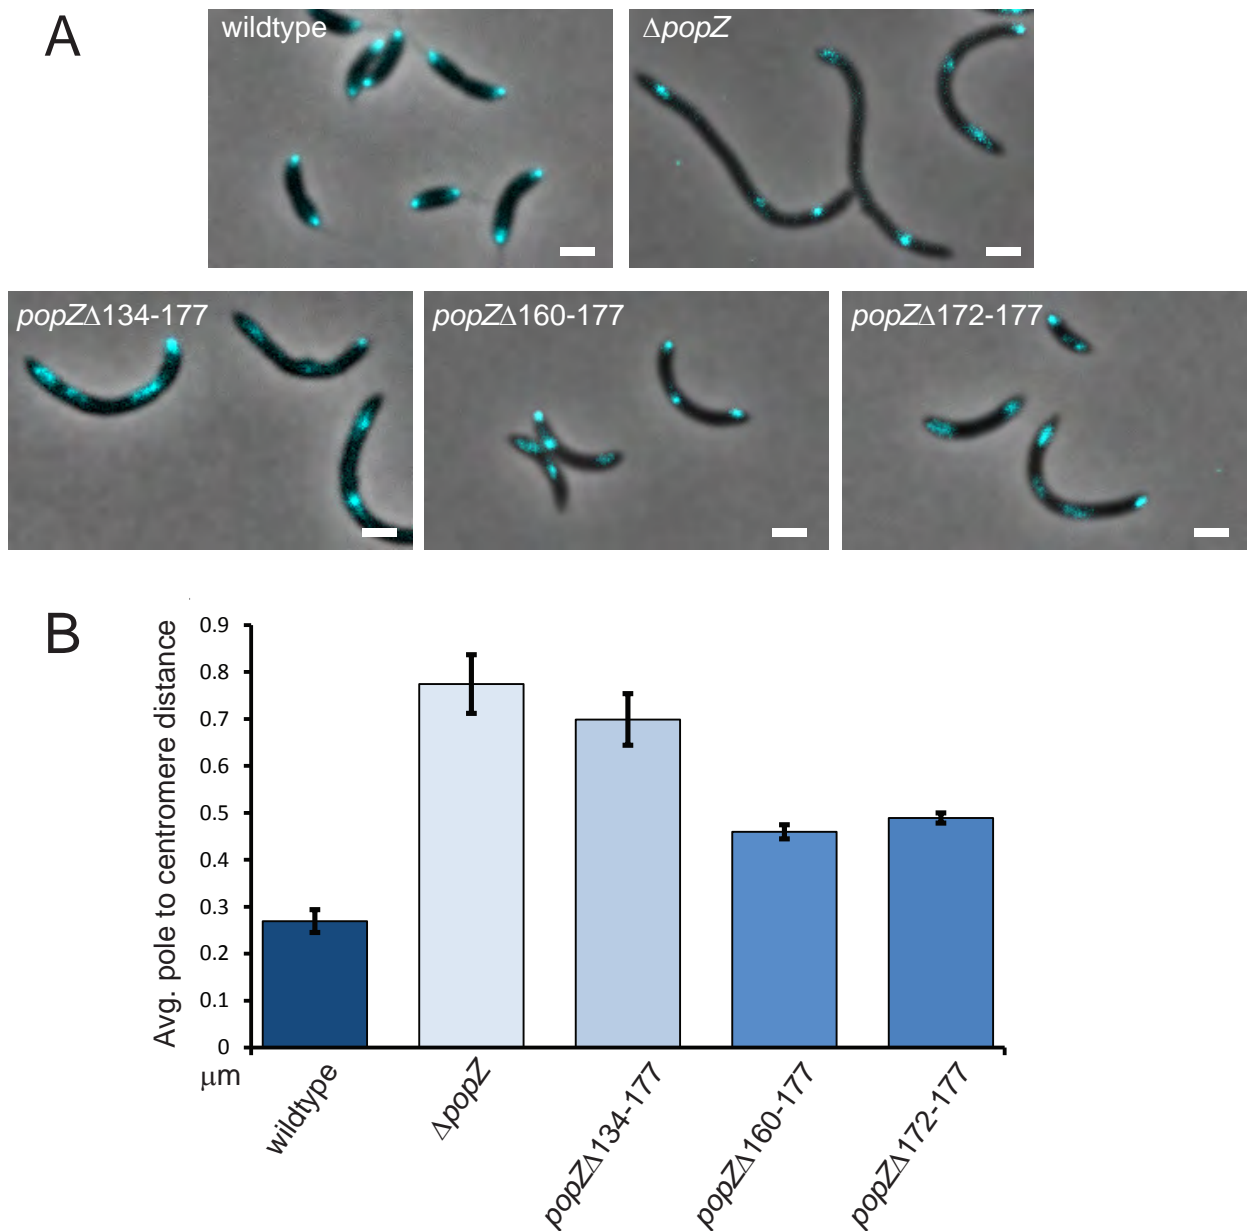

Centromere anchoring is inhibited in PopZ C-terminal truncation mutants.

A) Centromere position was observed in live cells in which the centromere binding protein MipZ was replaced with MipZ-CFP. In each strain, an untagged copy of wildtype *popZ* or the indicated *popZ* truncation mutant is expressed from the endogenous *popZ* promoter. Representative images from strains GB1107, GB1113, GB1127, GB1128, and GB1129 are shown. Fluorescence images are overlaid on phase contrast images. Bar = 1  $\mu\text{m}$ . B) The distance between a cell pole and the nearest centromere was calculated by drawing a straight line between the centroid of the MipZ-CFP focus and the contrast edge at the cell pole in the phase contrast image. Cells with only one centromere were omitted from the analysis. At least 100 cells (200 cell poles) of each genotype in A were quantified per experiment. The error bars represent the standard deviation of the average value calculated from three independent experiments.

Supplementary Figure S4

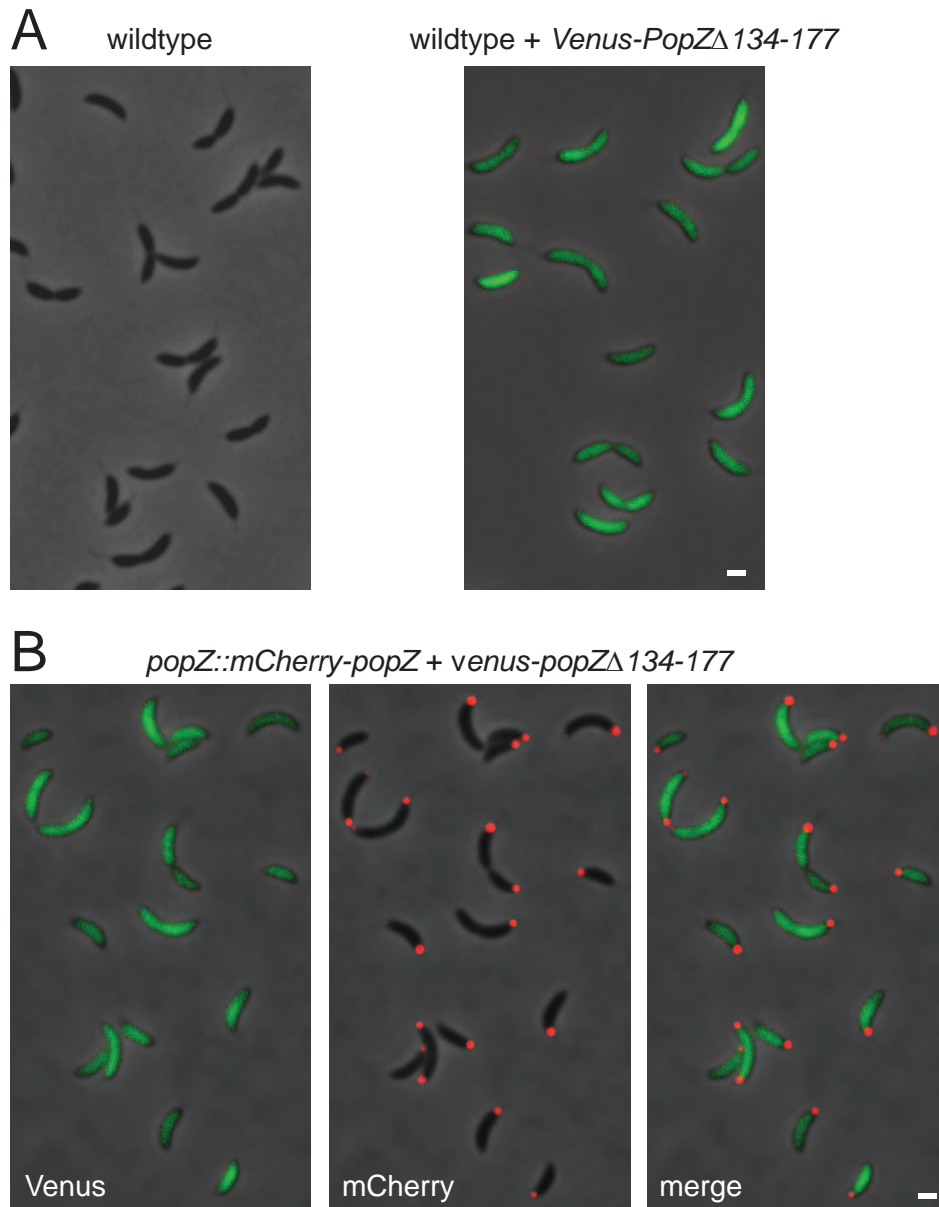

Diffusely localized *venus-popZ* $\Delta$ 134-177 does not have a dominant negative effect on PopZ activity.

A) *Venus-popZ* $\Delta$ 134-177 was expressed in a wildtype background (GB1121). The length of wildtype cells (left panel) is not changed after adding the *venus-popZ* $\Delta$ 134-177 expression plasmid (right panel), indicating that the N-terminal 133 amino acids of PopZ do not act as a dominant negative for inhibiting cell division. B) The *venus-popZ* $\Delta$ 134-177 expression plasmid was transformed into cells expressing full length mCherry-PopZ (GB1122). Polar localization of full length mCherry-PopZ was not perturbed. Where applicable, a fluorescence image is overlaid on a phase contrast image. Bar = 1  $\mu$ m.



## Supplementary Figure S5

*C. crescentus* CB15N,  $\Delta popZ$ , *spmX::spmX-mCherry*, pBXMCS-2(*mVenus-popZ\**)

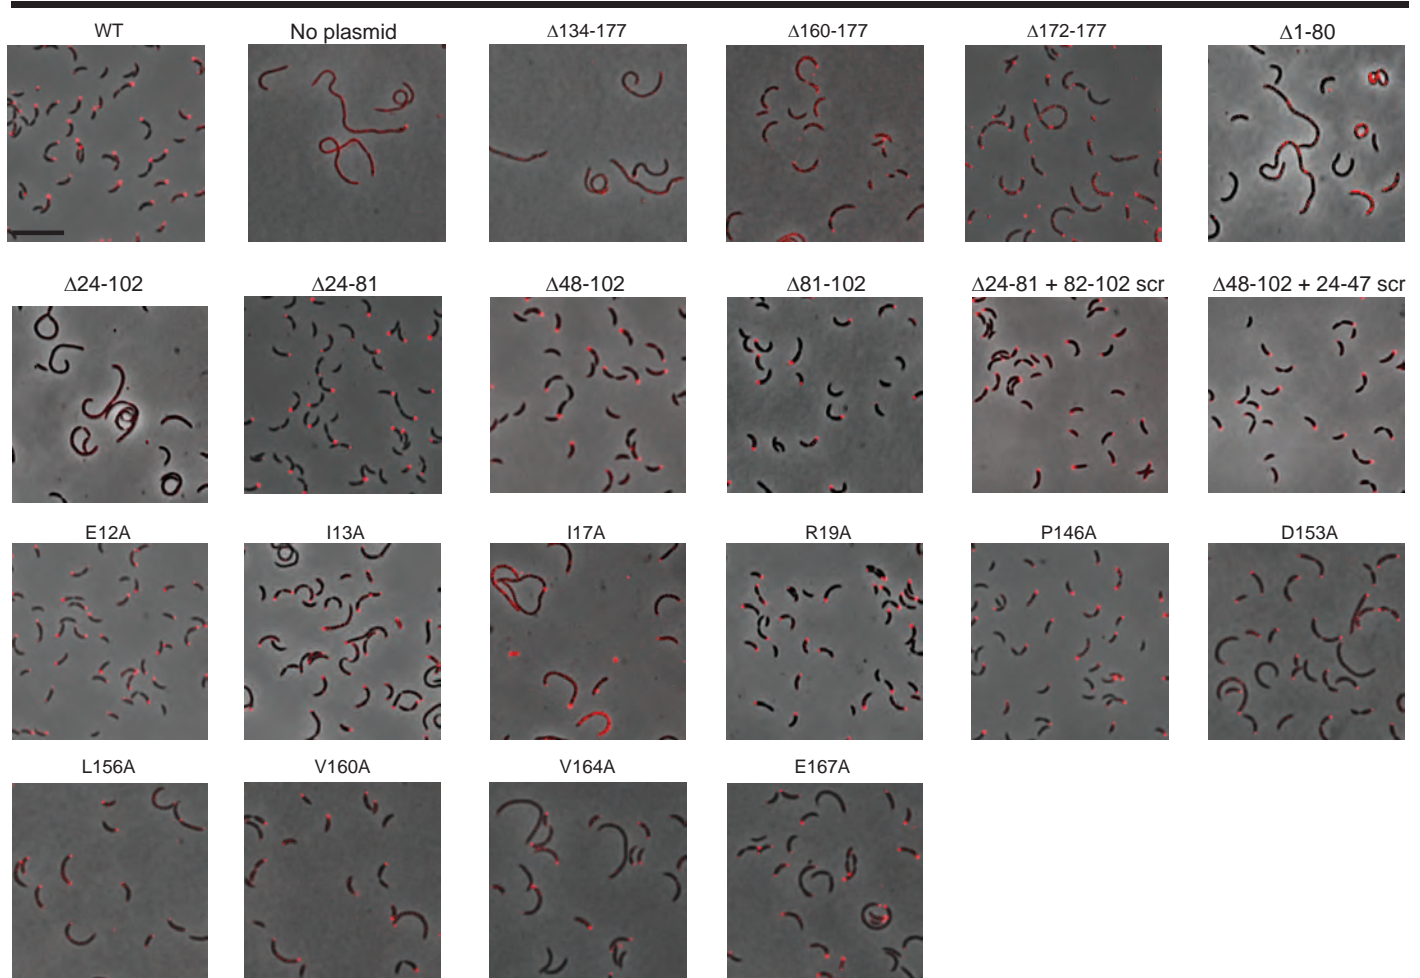

Localization of SpmX-mCherry in PopZ variant backgrounds.

SpmX-mCherry fluorescence (red) overlays the phase contrast image (grayscale). Bar = 9  $\mu$ m.

Representative images from AP253, AP236, AP280, AP300, AP282, AP299, AP254, AP257, AP298, AP342, AP343, AP344, AP292, AP293, AP290, AP291, AP283, AP285, AP286, AP287, AP288, and AP289 are presented.

Corresponding quantitation of polar SpmX-mCherry localization is presented in graphs in the main text figures.

## Supplemental Figure S6

*C. crescentus* CB15N,  $\Delta popZ$ , pBXMCS-2(*mVenus-popZ\**)

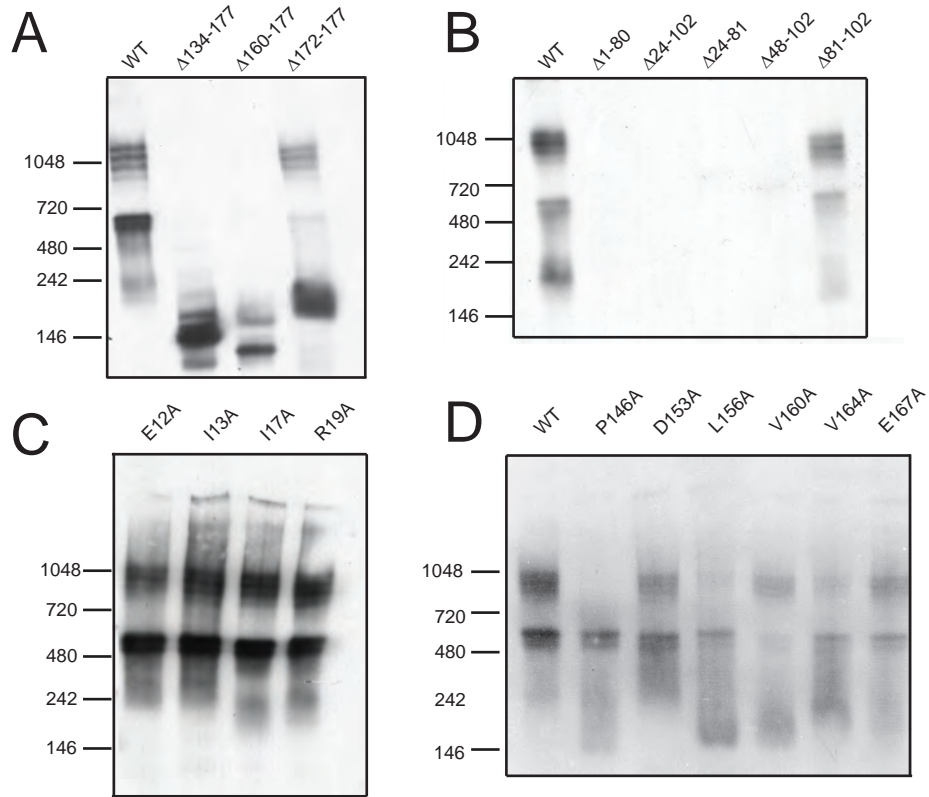

Electrophoretic migration of venus-tagged PopZ variant proteins.

Whole cell lysates of venus-tagged PopZ expressing strains in Figure 3B (A), Figure 4B (B) Figure 5B (C), and Figure 6B (D) of the main text were resolved native gels, then probed with anti-PopZ antisera by immunoblotting.

## Supplementary Figure S7

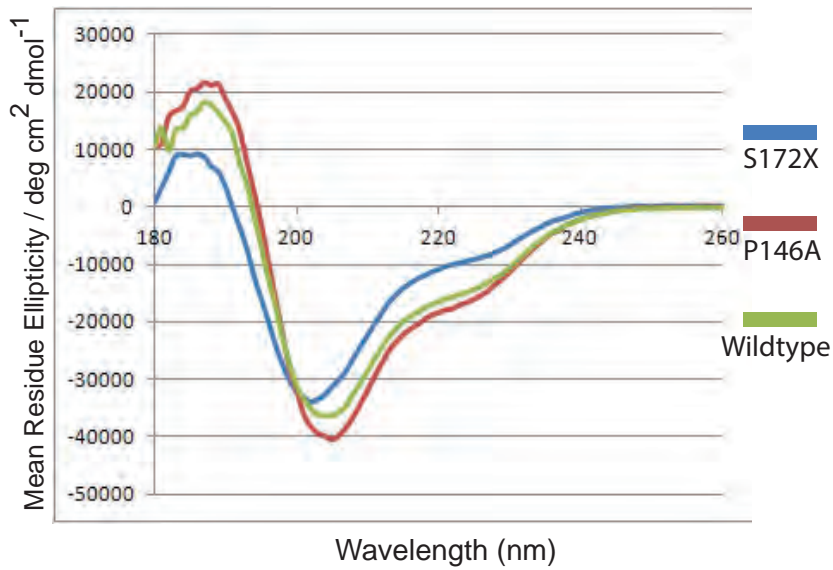

Circular dichroism analysis. Individual uv-CD spectra for purified wildtype, P146A, and PopZ $\Delta$ 172-177 proteins are compared by overlay. A positive band at 190 nm and negative bands at 208 nm and 222 nm are characteristic alpha helical signatures. The shift in the minimum to shorter wavelengths (203 nm for PopZ $\Delta$ 172-177 and 205 nm for PopZ P146A and wildtype) are indicative of the influence of disordered regions, which have a minimum signal at 200 nm (Chemes et al. 2012).

Chemes, L.B., Alonso, L.G., Noval, M.G., Prat-Gay, G. de (2012). Circular dichroism techniques for the analysis of intrinsically disordered proteins and domains. *Methods Mol Biol* **895**: 387–404

Supplementary Figure S8

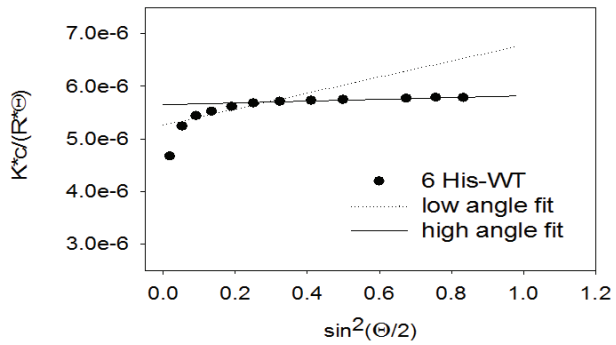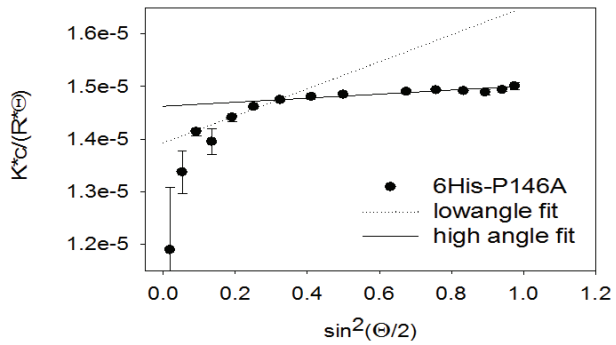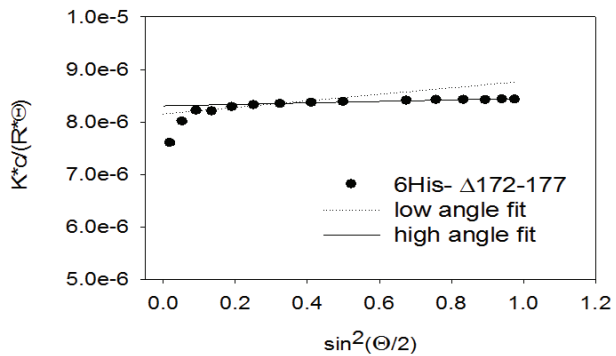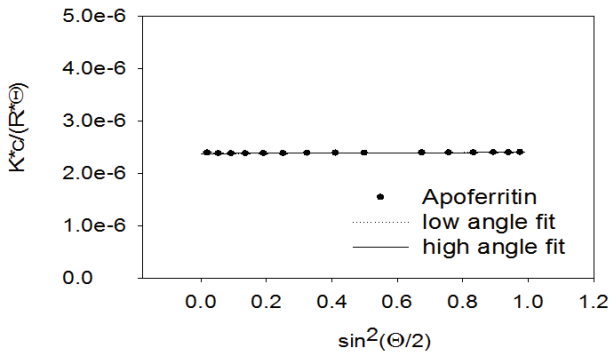

Illustration of non-linear angular dependence of scattered light for PopZ protein oligomers. A plot of  $K^*c/R(\theta)$  vs.  $\sin^2(\theta/2)$ , a Zimm plot (Zimm, 1948), yields a curve whose intercept gives  $(Mw)^{-1}$  and whose slope gives root-mean-square radius (rms), also known as radius of gyration,  $R_g$ , which characterizes particle dimensions independently of particle shape. Shown are Zimm plots for apexes of eluting peaks. Two separate curves are generated from data obtained generated by high or low angle incident light. In heterogenous samples, the data from lower angles is primarily influenced by the largest particles. The angular dependence of the wildtype and PopZ P146A samples is more skewed than the PopZ $\Delta$ 172-177 sample, indicating qualitative differences in the distributions of particle size. The Apoferritin control, which is uniform in particle size, is linear across all angles. Results of MW and rms determinations at higher angles are summarized in Table 1.

Zimm B H (1948) Apparatus and Methods for Measurement and Interpretation of the Angular Variation of Light Scattering; Preliminary Results on Polystyrene Solutions. *J.Chem.Phys.* **16**; 1099-1116

| <b>Supplementary Table 1: Bacterial strains</b> |                                                                                          |                                          |
|-------------------------------------------------|------------------------------------------------------------------------------------------|------------------------------------------|
| <b><i>C. crescentus</i> strains</b>             | <b>Relevant genotype/description</b>                                                     | <b>Construction, source or reference</b> |
| AP236                                           | <i>spmX:: spmX mCherry;</i><br><i>popZ::Δ</i>                                            | Bowman <i>et al.</i> (2010)              |
| AP253                                           | <i>spmX:: spmX mCherry;</i><br><i>popZ::Δ; pBXMCS-2 +</i><br><i>mVenus PopZ</i>          | pAP214 electroporated<br>into AP236      |
| AP254                                           | <i>spmX:: spmX mCherry;</i><br><i>popZ::Δ; pBXMCS-2 +</i><br><i>mVenus PopZ Δ24–102</i>  | pAP237 electroporated<br>into AP236      |
| AP257                                           | <i>spmX:: spmX mCherry;</i><br><i>popZ::Δ; pBXMCS-2 +</i><br><i>mVenus PopZ Δ24–81</i>   | pAP240 electroporated<br>into AP236      |
| AP280                                           | <i>spmX:: spmX mCherry;</i><br><i>popZ::Δ; pBXMCS-2 +</i><br><i>mVenus PopZ Δ134–177</i> | pAP259 electroporated<br>into AP236      |
| AP282                                           | <i>spmX:: spmX mCherry;</i><br><i>popZ::Δ; pBXMCS-2 +</i><br><i>mVenus PopZ Δ172–177</i> | pAP261 electroporated<br>into AP236      |
| AP283                                           | <i>spmX:: spmX mCherry;</i><br><i>popZ::Δ; pBXMCS-2 +</i><br><i>mVenus PopZ P146A</i>    | pAP262 electroporated<br>into AP236      |
| AP285                                           | <i>spmX:: spmX mCherry;</i><br><i>popZ::Δ; pBXMCS-2 +</i><br><i>mVenus PopZ D153A</i>    | pAP264 electroporated<br>into AP236      |
| AP286                                           | <i>spmX:: spmX mCherry;</i><br><i>popZ::Δ; pBXMCS-2 +</i><br><i>mVenus PopZ L156A</i>    | pAP265 electroporated<br>into AP236      |
| AP287                                           | <i>spmX:: spmX mCherry;</i><br><i>popZ::Δ; pBXMCS-2 +</i><br><i>mVenus PopZ V160A</i>    | pAP266 electroporated<br>into AP236      |
| AP288                                           | <i>spmX:: spmX mCherry;</i><br><i>popZ::Δ,pBXMCS-2 +</i><br><i>mVenus PopZ V164A</i>     | pAP267 electroporated<br>into AP236      |
| AP289                                           | <i>spmX:: spmX mCherry;</i><br><i>popZ::Δ,pBXMCS-2 +</i><br><i>mVenus PopZ E167A</i>     | pAP268 electroporated<br>into AP236      |
| AP290                                           | <i>spmX:: spmX mCherry;</i><br><i>popZ::Δ; pBXMCS-2 +</i><br><i>mVenus PopZ I13A</i>     | pAP269 electroporated<br>into AP236      |
|                                                 |                                                                                          |                                          |

|       |                                                                                          |                                     |
|-------|------------------------------------------------------------------------------------------|-------------------------------------|
| AP291 | <i>spmX:: spmX mCherry;</i><br><i>popZ::Δ; pBXMCS-2 +</i><br><i>mVenus PopZ I17A</i>     | pAP270 electroporated<br>into AP236 |
| AP292 | <i>spmX:: spmX mCherry;</i><br><i>popZ::Δ; pBXMCS-2 +</i><br><i>mVenus PopZ E12A</i>     | pAP272 electroporated<br>into AP236 |
| AP293 | <i>spmX:: spmX mCherry;</i><br><i>popZ::Δ; pBXMCS-2 +</i><br><i>mVenus PopZ R19A</i>     | pAP271 electroporated<br>into AP236 |
| AP298 | <i>spmX:: spmX mCherry;</i><br><i>popZ::Δ; pBXMCS-2 +</i><br><i>mVenus PopZ Δ81–102</i>  | pAP277 electroporated<br>into AP236 |
| AP299 | <i>spmX:: spmX mCherry;</i><br><i>popZ::Δ; pBXMCS-2 +</i><br><i>mVenus PopZ Δ1–80</i>    | pAP278 electroporated<br>into AP236 |
| AP300 | <i>spmX:: spmX mCherry;</i><br><i>popZ::Δ; pBXMCS-2 +</i><br><i>mVenus PopZ Δ160–177</i> | pAP279 electroporated<br>into AP236 |
| AP302 | <i>popZ::Δ; pBXMCS-2 +</i><br><i>mVenus PopZ Δ48–102</i>                                 | pAP301 electroporated<br>into GB255 |
| AP303 | <i>popZ::Δ; pBXMCS-2 +</i><br><i>mVenus PopZ Δ134–177</i>                                | pAP259 electroporated<br>into GB255 |
| AP305 | <i>popZ::Δ; pBXMCS-2 +</i><br><i>mVenus PopZ Δ172–177</i>                                | pAP261 electroporated<br>into GB255 |
| AP306 | <i>popZ::Δ; pBXMCS-2 +</i><br><i>mVenus PopZ P146A</i>                                   | pAP262 electroporated<br>into GB255 |
| AP308 | <i>popZ::Δ; pBXMCS-2 +</i><br><i>mVenus PopZ D153A</i>                                   | pAP264 electroporated<br>into GB255 |
| AP309 | <i>popZ::Δ; pBXMCS-2 +</i><br><i>mVenus PopZ L156A</i>                                   | pAP265 electroporated<br>into GB255 |
| AP310 | <i>popZ::Δ; pBXMCS-2 +</i><br><i>mVenus PopZ V160A</i>                                   | pAP266 electroporated<br>into GB255 |
| AP311 | <i>popZ::Δ; pBXMCS-2 +</i><br><i>mVenus PopZ V164A</i>                                   | pAP267 electroporated<br>into GB255 |
| AP312 | <i>popZ::Δ; pBXMCS-2 +</i><br><i>mVenus PopZ E167A</i>                                   | pAP268 electroporated<br>into GB255 |
| AP313 | <i>popZ::Δ; pBXMCS-2 +</i><br><i>mVenus PopZ I13A</i>                                    | pAP269 electroporated<br>into GB255 |
| AP314 | <i>popZ::Δ; pBXMCS-2 +</i><br><i>mVenus PopZ I17A</i>                                    | pAP270 electroporated<br>into GB255 |
| AP315 | <i>popZ::Δ; pBXMCS-2 +</i><br><i>mVenus PopZ E12A</i>                                    | pAP272 electroporated<br>into GB255 |
| AP316 | <i>popZ::Δ; pBXMCS-2 +</i><br><i>mVenus PopZ R19A</i>                                    | pAP271 electroporated<br>into GB255 |



|       |                                                                                |                                  |
|-------|--------------------------------------------------------------------------------|----------------------------------|
| AP320 | <i>popZ::Δ; pBXMCS-2 + mVenus PopZ Δ81–102</i>                                 | pAP277 electroporated into GB255 |
| AP321 | <i>popZ::Δ; pBXMCS-2 + mVenus PopZ Δ1–80</i>                                   | pAP278 electroporated into GB255 |
| AP322 | <i>popZ::Δ; pBXMCS-2 + mVenus PopZ Δ160–177</i>                                | pAP279 electroporated into GB255 |
| AP323 | <i>popZ::Δ; pBXMCS-2 + mVenus PopZ</i>                                         | pAP214 electroporated into GB255 |
| AP324 | <i>popZ::Δ; pBXMCS-2 + mVenus PopZ Δ24–102</i>                                 | pAP237 electroporated into GB255 |
| AP327 | <i>popZ::Δ; pBXMCS-2 + mVenus PopZ Δ24–81</i>                                  | pAP240 electroporated into GB255 |
| AP342 | <i>spmX::spmX mCherry; popZ::Δ; pBXMCS-2 + mVenus PopZ Δ48–102</i>             | pAP301 electroporated into AP236 |
| AP343 | <i>spmX::spmX mCherry; popZ::Δ; pBXMCS-2 + mVenus PopZ Δ48–102 + 24-47 scr</i> | pAP332 electroporated into AP236 |
| AP344 | <i>spmX::spmX mCherry; popZ::Δ; pBXMCS-2 + mVenus PopZ Δ24–81 + 82-102 scr</i> | pAP333 electroporated into AP236 |
| CB15N | Synchronizable derivative of WT CB15                                           | Evinger and Agabian (1977)       |
| GB135 | <i>popZ::popZ-FLAG</i>                                                         | Bowman <i>et al.</i> (2008)      |
| GB255 | <i>popZ::Δ</i>                                                                 | Bowman <i>et al.</i> (2008)      |
| GB544 | <i>popZ::Δ; vanA::mCherry-popZ R1</i>                                          | pGB525 mated into GB255          |
| GB545 | <i>popZ::Δ; vanA::mCherry-popZ R2</i>                                          | pGB526 mated into GB255          |
| GB750 | <i>popZ::Δ; vanA::mCherry-popZ R3</i>                                          | pGB527 mated into GB255          |
| GB757 | <i>popZ::popZ-FLAG; pBXMCS-2 + mCherry-PopZ R1</i>                             | pGB570 electroporated into GB135 |
| GB758 | <i>popZ::popZ-FLAG; pBXMCS-2 + mCherry-PopZ R3</i>                             | pGB572 electroporated into GB135 |
| GB885 | <i>popZ::popZ Δ134–177</i>                                                     | pGB844 mated into GB255          |
| GB886 | <i>popZ::popZ Δ160–177</i>                                                     | pGB845 mated into GB255          |
| GB888 | <i>popZ::popZ Δ172–177</i>                                                     | pGB823 mated into GB255          |
| GB890 | <i>popZ::popZ P146A</i>                                                        | pGB822 mated into GB255          |

|                              |                                                            |                                                        |
|------------------------------|------------------------------------------------------------|--------------------------------------------------------|
| GB892                        | <i>popZ::popZ D153A</i>                                    | pGB848 mated into GB255                                |
| GB893                        | <i>popZ::popZ L156A</i>                                    | pGB849 mated into GB255                                |
| GB894                        | <i>popZ::popZ V160A</i>                                    | pGB850 mated into GB255                                |
| GB895                        | <i>popZ::popZ V164A</i>                                    | pGB851 mated into GB255                                |
| GB896                        | <i>popZ::popZ E167A</i>                                    | pGB852 mated into GB255                                |
| GB897                        | <i>popZ::popZ I13A</i>                                     | pGB853 mated into GB255                                |
| GB898                        | <i>popZ::popZ I17A</i>                                     | pGB854 mated into GB255                                |
| GB899                        | <i>popZ::popZ E12A</i>                                     | pGB855 mated into GB255                                |
| GB900                        | <i>popZ::popZ R19A</i>                                     | pGB856 mated into GB255                                |
| GB1007                       | <i>popZ::mCherry-PopZ</i>                                  | pPD 72 mated into GB255                                |
| GB1078                       | <i>popZ::Δ; vanA::mCherry-popZ</i>                         | pGB528 mated into GB255                                |
| GB1107                       | <i>mipZ::mipZ-CFP</i>                                      | Goley <i>et al.</i> (2011)                             |
| GB1113                       | <i>mipZ::mipZ-CFP; popZ::Δ</i>                             | <i>popZ::Δ</i> transduced from GB255 into GB113        |
| GB1115                       | <i>popZ::popZ Δ1–80</i>                                    | pGB1108 mated into GB255                               |
| GB1116                       | <i>popZ::popZ Δ24–81</i>                                   | pGB1109 mated into GB255                               |
| GB1117                       | <i>popZ::popZ Δ24–102</i>                                  | pGB1110 mated into GB255                               |
| GB1118                       | <i>popZ::popZ Δ48–102</i>                                  | pGB1111 mated into GB255                               |
| GB1119                       | <i>popZ::popZ Δ81–102</i>                                  | pGB1112 mated into GB255                               |
| GB1121                       | <i>pBXMCS-2 + mVenus PopZ Δ134–177</i>                     | pAP259 electroporated into CB15N                       |
| GB1122                       | <i>popZ::mCherry-popZ; pBXMCS-2 + mVenus PopZ Δ134–177</i> | pAP259 electroporated into GB1007                      |
| GB1127                       | <i>mipZ::mipZ-CFP; popZ::Δ134–177</i>                      | <i>popZ::Δ134–177</i> transduced from GB855 into GB113 |
| GB1128                       | <i>mipZ::mipZ-CFP; popZ::Δ160–177</i>                      | <i>popZ::Δ160–177</i> transduced from GB856 into GB113 |
| GB1129                       | <i>mipZ::mipZ-CFP; popZ::Δ172–177</i>                      | <i>popZ::Δ172–177</i> transduced from GB888 into GB113 |
| <b><i>E. coli</i> stains</b> | <b>Relevant genotype/description</b>                       | <b>Source</b>                                          |
| Rosetta                      | High protein expression                                    | Novagen                                                |
| GB169                        | <i>pET28a + PopZ</i>                                       | Cloned into pET28a via 5' NdeI and 3' EcoRI sites      |
| GB923                        | <i>pET28a + PopZ P146A</i>                                 | Cloned into pET28a via 5' NdeI and 3' EcoRI sites      |
|                              |                                                            |                                                        |

|       |                               |                                                   |
|-------|-------------------------------|---------------------------------------------------|
| GB924 | <i>pET28a + PopZ Δ172–177</i> | Cloned into pET28a via 5' NdeI and 3' EcoRI sites |
|-------|-------------------------------|---------------------------------------------------|

Bowman, G.R., Comolli, L.R., Gaietta, G.M., Fero, M., Hong, S.-H., Jones, Y., Lee, J.H., Downing, K.H., Ellisman, M.H., McAdams, H.H., Shapiro, L. (2010) *Caulobacter* PopZ forms a polar subdomain dictating sequential changes in pole composition and function. *Mol Microbiol* **76**: 173–189

Bowman, G.R., Comolli, L.R., Zhu, J., Eckart, M., Koenig, M., Downing, K.H., Moerner, W.E., Earnest, T., Shapiro, L. (2008) A polymeric protein anchors the chromosomal origin/ParB complex at a bacterial cell pole. *Cell* **134**: 945–955

Evinger, M., Agabian, N. (1977) Envelope-associated nucleoid from *Caulobacter crescentus* stalked and swarmer cells. *J Bacteriol* **132**: 294–301

Goley, E.D., Yeh, Y.-C., Hong, S.-H., Fero, M.J., Abeliuk, E., McAdams, H.H., Shapiro, L. (2011) Assembly of the *Caulobacter* cell division machine. *Mol Microbiol* **80**: 1680–1698

| <b>Supplementary Table 2: Plasmids</b> |                                             |                 |                                   |
|----------------------------------------|---------------------------------------------|-----------------|-----------------------------------|
| <b>Plasmids</b>                        | <b>Description</b>                          | <b>Backbone</b> | <b>Source</b>                     |
| pBXMCS-2                               | High copy replicating plasmid               | pBXMCS-2        | Thianbichler <i>et al.</i> (2007) |
| pMCS-4                                 | Integrating plasmid                         | pMCS-4          | Thianbichler <i>et al.</i> (2007) |
| pAP214                                 | High copy <i>PxylX-mVenus-PopZ</i>          | pBXMCS-2        | This study                        |
| pAP237                                 | High copy <i>PxylX-mVenus-PopZ Δ24–102</i>  | pBXMCS-2        | This study                        |
| pAP240                                 | High copy <i>PxylX-mVenus-PopZ Δ24–81</i>   | pBXMCS-2        | This study                        |
| pAP259                                 | High copy <i>PxylX-mVenus-PopZ Δ134–177</i> | pBXMCS-2        | This study                        |
| pAP261                                 | High copy <i>PxylX-mVenus-PopZ Δ172–177</i> | pBXMCS-2        | This study                        |
|                                        |                                             |                 |                                   |

|        |                                                                           |          |            |
|--------|---------------------------------------------------------------------------|----------|------------|
| pAP262 | High copy <i>PxylX-mVenus-PopZ P146A</i>                                  | pBXMCS-2 | This study |
| pAP264 | High copy <i>PxylX-mVenus-PopZ D153A</i>                                  | pBXMCS-2 | This study |
| pAP265 | High copy <i>PxylX-mVenus-PopZ L156A</i>                                  | pBXMCS-2 | This study |
| pAP266 | High copy <i>PxylX-mVenus-PopZ V160A</i>                                  | pBXMCS-2 | This study |
| pAP267 | High copy <i>PxylX-mVenus-PopZ V164A</i>                                  | pBXMCS-2 | This study |
| pAP268 | High copy <i>PxylX-mVenus-PopZ E167A</i>                                  | pBXMCS-2 | This study |
| pAP269 | High copy <i>PxylX-mVenus-PopZ I13A</i>                                   | pBXMCS-2 | This study |
| pAP270 | High copy <i>PxylX-mVenus-PopZ I17A</i>                                   | pBXMCS-2 | This study |
| pAP271 | High copy <i>PxylX-mVenus-PopZ E12A</i>                                   | pBXMCS-2 | This study |
| pAP272 | High copy <i>PxylX-mVenus-PopZ R19A</i>                                   | pBXMCS-2 | This study |
| pAP277 | High copy <i>PxylX-mVenus-PopZ <math>\Delta 81-102</math></i>             | pBXMCS-2 | This study |
| pAP278 | High copy <i>PxylX-mVenus-PopZ <math>\Delta 1-80</math></i>               | pBXMCS-2 | This study |
| pAP279 | High copy <i>PxylX-mVenus-PopZ <math>\Delta 160-177</math></i>            | pBXMCS-2 | This study |
| pAP301 | High copy <i>PxylX-mVenus-PopZ <math>\Delta 48-102</math></i>             | pBXMCS-2 | This study |
| pAP332 | High copy <i>PxylX-mVenus-PopZ <math>\Delta 48-102 + 24-47 scr</math></i> | pBXMCS-2 | This study |
|        |                                                                           |          |            |

|        |                                                                       |          |            |
|--------|-----------------------------------------------------------------------|----------|------------|
| pAP333 | High copy <i>PxylX-mVenus-PopZ</i> $\Delta 24-81 + 82-102$ <i>scr</i> | pBXMCS-2 | This study |
| pGB525 | <i>PvanA-mCherry-popZ R1</i> integrates at <i>vanA</i> locus          | pVCHYN-2 | This study |
| pGB526 | <i>PvanA-mCherry-popZ R2</i> integrates at <i>vanA</i> locus          | pVCHYN-2 | This study |
| pGB527 | <i>PvanA-mCherry-popZ R3</i> integrates at <i>vanA</i> locus          | pVCHYN-2 | This study |
| pGB528 | <i>PvanA-mCherry-popZ</i> integrates at <i>vanA</i> locus             | pVCHYN-2 | This study |
| pGB570 | High copy <i>PxylX-mCherry-PopZ R1</i>                                | pBXMCS-2 | This study |
| pGB572 | High copy <i>PxylX-mCherry-PopZ R3</i>                                | pBXMCS-2 | This study |
| pGB822 | <i>PpopZ-PopZ P146A</i> integrates at <i>popZ</i> locus               | pMCS-4   | This study |
| pGB823 | <i>PpopZ-PopZ</i> $\Delta 172-177$ integrates at <i>popZ</i> locus    | pMCS-4   | This study |
| pGB844 | <i>PpopZ-PopZ</i> $\Delta 134-177$ integrates at <i>popZ</i> locus    | pMCS-4   | This study |
| pGB845 | <i>PpopZ-PopZ</i> $\Delta 160-177$ integrates at <i>popZ</i> locus    | pMCS-4   | This study |
| pGB848 | <i>PpopZ-PopZ D153A</i> integrates at <i>popZ</i> locus               | pMCS-4   | This study |
| pGB849 | <i>PpopZ-PopZ L156A</i> integrates at <i>popZ</i> locus               | pMCS-4   | This study |
| pGB850 | <i>PpopZ-PopZ V160A</i> integrates at <i>popZ</i> locus               | pMCS-4   | This study |
|        |                                                                       |          |            |

|         |                                                           |        |            |
|---------|-----------------------------------------------------------|--------|------------|
| pGB851  | <i>PpopZ-PopZ V164A</i> integrates at <i>popZ</i> locus   | pMCS-4 | This study |
| pGB852  | <i>PpopZ-PopZ E167A</i> integrates at <i>popZ</i> locus   | pMCS-4 | This study |
| pGB853  | <i>PpopZ-PopZ I13A</i> integrates at <i>popZ</i> locus    | pMCS-4 | This study |
| pGB854  | <i>PpopZ-PopZ I17A</i> integrates at <i>popZ</i> locus    | pMCS-4 | This study |
| pGB855  | <i>PpopZ-PopZ E12A</i> integrates at <i>popZ</i> locus    | pMCS-4 | This study |
| pGB856  | <i>PpopZ-PopZ R19A</i> integrates at <i>popZ</i> locus    | pMCS-4 | This study |
| pGB1108 | <i>PpopZ-PopZ Δ1–80</i> integrates at <i>popZ</i> locus   | pMCS-4 | This study |
| pGB1109 | <i>PpopZ-PopZ Δ24–81</i> integrates at <i>popZ</i> locus  | pMCS-4 | This study |
| pGB1110 | <i>PpopZ-PopZ Δ24–102</i> integrates at <i>popZ</i> locus | pMCS-4 | This study |
| pGB1111 | <i>PpopZ-PopZ Δ48–102</i> integrates at <i>popZ</i> locus | pMCS-4 | This study |
| pGB1112 | <i>PpopZ-PopZ Δ81–102</i> integrates at <i>popZ</i> locus | pMCS-4 | This study |
| pPD72   | <i>PpopZ-mCherry-PopZ</i> integrates at <i>popZ</i> locus | pMCS-4 | This study |

Thanbichler, M., Iniesta, A.A., Shapiro, L. (2007) A comprehensive set of plasmids for vanillate- and xylose-inducible gene expression in *Caulobacter crescentus*. *Nucleic Acids Res* 35: e137
